# Supplementary material for: Optimal staging system for predicting the prognosis of patients with hepatocellular carcinoma in China: a retrospective study
Source: BMC Cancer. 2016 Jul 7;16:424. doi: 10.1186/s12885-016-2420-0 (PMC4937540; doi:10.1186/s12885-016-2420-0)
Supplement: Additional file 1: — Availability of data and material(1). (XLS 99 kb) [file 12885_2016_2420_MOESM1_ESM.xls]

## Sheet: Sheet2
Patients	Sex	Age	ECOG PS	Tumor size (cm)	Number of lesions	Lobar involvement	Tumor morphology	Vascular and/or organ invasion	Tumor differentiation	Hepatic encephalopathy	Ascites	Total bilirubin (µmol/l)	Albumin (g/l)	Prothrombin time (sec)	Child-Pugh Grade	Child-Pugh Score	AFP	HBsAg	HCVAb	Alcohol	Other	Lymph node metastasis	Distant metastasis	Tumor thrombosis	Portal hypertension	Cirrhosis	Treatment modality	Overall survival(months)	CLIP	BCLC	TNM	CS	Current outcomes
1	2	56	1	4.5	1	1	1	0	4	0	0	10.6	37.7	0.6	1	5	800	1	0	0	0	1	0	7	0	1	1	13	1	3	6	5	1
2	2	61	0	4	1	1	2	0	3	0	0	16.1	44.7	0	1	5	2.54	1	0	0	0	0	0	0	0	1	1	7.5	1	1	1	2	1
3	2	55	1	4.5	1	1	1	0	4	0	0	9.7	45.7	0	1	5	230.09	0	0	0	1	0	0	0	0	1	1	13.5	0	3	1	2	1
4	1	67	1	4	1	1	1	0	2	0	0	7.9	44.1	0	1	5	507.7	0	0	0	1	1	0	0	0	1	1	7.5	1	3	6	5	1
5	2	52	0	7.9	1	1	1	0	3	0	0	14.6	51.6	0	1	5	5.72	1	0	0	0	0	0	0	0	1	1	9	0	2	1	3	1
6	2	56	1	1.7	1	2	1	0	3	0	0	19.3	39.2	0	1	5	38.79	1	0	0	0	0	0	0	0	1	1	12	0	3	1	1	1
7	2	40	1	8.5	1	2	1	1	1	0	1	19.1	45.9	0	1	6	169.9	1	0	0	0	0	0	1	0	1	1	8.5	1	3	4	5	0
8	2	50	1	3.5	1	1	1	0	3	0	0	15.6	37	0	1	5	10.11	1	0	0	0	0	0	0	0	1	1	13.5	0	3	1	2	1
9	2	44	0	3.5	1	2	1	0	3	0	0	6.5	41.3	0	1	5	148.14	1	0	0	0	0	0	0	0	1	1	37.5	0	1	1	3	1
10	2	62	1	4.2	2	1	2	0	4	0	1	13.8	38.8	0	1	6	162.4	1	0	0	0	0	0	0	0	1	1	3	1	3	2	2	1
11	1	62	1	3.8	1	1	1	0	2	0	0	10.5	46.1	0	1	5	5400	0	0	0	1	0	0	0	0	1	1	12	1	3	1	2	1
12	2	54	1	8	1	1	1	0	1	0	0	10	46.1	0	1	5	39.85	1	0	0	0	0	0	0	0	1	1	10	0	3	1	3	1
13	2	59	1	2.5	1	1	1	0	2	0	0	15.1	39.3	0	1	5	9.65	1	0	0	0	0	0	0	0	1	1	3.5	0	3	1	1	1
14	2	63	0	7	3	2	2	0	5	0	1	15.3	39.2	0	1	6	7.9	1	0	0	0	0	0	0	0	1	1	6.5	1	2	3	4	1
15	2	58	0	4.5	1	1	1	0	2	0	1	33.6	37.1	0	1	6	29.85	1	0	0	0	0	0	0	1	1	1	11	1	1	1	2	1
16	2	63	0	4.5	1	1	1	0	5	0	0	16.6	39.9	0	1	5	204.67	1	0	0	0	0	0	0	0	1	1	10.5	0	1	1	2	1
17	2	57	3	-4	3	2	3	1	-6	0	2	222	35.4	0	2	9	-1	1	0	0	0	0	0	1	1	1	6	1	-2	4	4	5	0
18	2	62	0	4	1	1	1	0	2	0	0	17.9	47.1	0	1	5	52.36	1	0	0	0	0	0	0	0	1	1	10	0	1	1	2	1
19	2	50	1	5.5	1	1	1	0	2	0	0	11.6	46.3	0	1	5	1.07	1	0	0	0	0	0	0	0	1	1	11	0	3	1	3	0
20	1	34	1	14	1	2	3	0	2	0	0	9.9	38.1	0	1	5	7.36	0	0	0	1	0	1	0	0	0	1	10.5	2	3	7	5	1
21	2	70	0	3.5	1	1	1	0	2	0	1	15.4	42.6	0	1	6	2474	1	0	0	0	0	0	0	0	1	1	4.5	1	1	1	2	1
22	1	53	0	1.3	3	2	2	0	4	0	1	24.4	34.9	0	2	7	574.9	0	1	0	0	0	0	0	1	1	1	7	3	2	2	4	1
23	2	65	1	4	1	1	3	0	3	0	1	59	27.7	2	3	10	424.9	1	0	0	0	0	0	0	0	1	1	6	5	4	5	6	1
24	2	51	1	12	1	2	3	1	2	0	1	12.3	36.8	0	1	6	24200	1	0	0	0	0	0	0	0	1	1	9.5	3	3	2	4	1
25	2	60	0	2.5	2	2	2	0	-6	0	0	11	36.6	0	1	5	4.36	1	0	0	0	0	0	0	0	1	1	19	1	1	2	3	0
26	2	67	0	3.5	2	2	2	0	3	0	0	8.3	43.2	0	1	5	7.71	0	1	0	0	0	0	0	0	1	1	12	1	2	2	3	1
27	2	51	1	3.5	1	2	1	0	3	0	0	13.4	46.1	0	1	5	10.57	0	0	0	1	0	0	0	0	1	1	4	0	3	1	3	1
28	2	60	3	4.5	1	1	3	3	3	0	1	19.6	36.3	0	1	6	-1	1	0	0	0	0	1	0	0	1	1	50	-2	4	7	5	1
29	2	63	1	8.5	1	2	3	3	2	0	0	9.8	34.7	0	1	6	7435	1	0	0	0	0	0	0	0	1	1	8	3	3	5	4	1
30	2	56	0	2.7	1	1	1	0	2	0	0	12.2	41.6	0	1	5	256.23	1	0	0	0	0	0	0	0	1	1	3	0	1	1	1	1
31	1	52	0	2.5	1	1	1	0	3	0	0	14.7	47.7	0	1	5	76.01	1	0	0	0	0	0	0	1	1	1	28	0	1	1	1	1
32	2	68	2	-4	3	2	2	0	1	0	0	15.4	36.5	0	1	5	310.4	1	0	0	0	0	0	0	1	1	1	3.5	1	3	2	3	0
33	2	48	0	3	1	1	1	0	2	0	0	8.8	37.8	0	1	5	101.5	1	0	0	0	1	0	0	0	1	1	6	0	3	6	5	1
34	2	42	2	10	1	2	3	1	4	0	0	39.8	36.5	0.3	1	6	800	1	0	0	0	0	0	4	1	1	1	7	3	3	4	5	0
35	1	58	1	3.3	1	1	1	0	4	0	1	7.8	38.4	0	1	6	180.7	1	0	0	0	0	0	0	0	1	1	15	0	3	1	2	1
36	2	30	1	8	3	2	3	1	2	0	0	14.8	44.9	0	1	5	225.48	1	0	0	0	0	0	0	0	0	1	29.5	2	3	4	4	1
37	1	42	2	5.5	1	1	1	0	1	0	1	7.7	32.1	2.8	2	7	8.77	1	0	0	0	0	0	0	0	1	1	8	1	3	1	4	1
38	2	57	1	6	1	2	1	0	4	0	0	5.7	33	0	1	6	4695	1	0	0	0	1	0	5	0	1	1	9.5	3	3	6	5	1
39	2	49	1	4	3	2	2	0	5	0	0	12	40.6	0	1	5	7.79	1	0	0	0	0	0	0	0	1	1	35	1	3	2	3	1
40	2	79	0	5	1	1	1	0	2	0	0	15.6	39.8	0	1	5	14.24	1	1	0	0	0	0	0	0	1	1	53.5	0	1	1	2	1
41	2	61	0	3.5	1	1	1	0	2	0	0	15.3	42	0	1	5	11.95	1	0	0	0	0	0	0	0	1	1	8	0	1	1	2	1
42	2	50	1	4.5	1	1	1	0	2	0	0	9.8	41.8	0	1	5	6.08	0	0	0	1	0	0	0	0	1	1	10.5	0	3	1	2	1
43	2	43	1	2.5	1	1	1	0	1	0	0	28.7	35.9	0	1	5	16.71	1	0	0	0	0	0	0	0	1	1	12	0	3	1	1	0
44	2	47	2	9	1	1	3	0	1	0	2	15.9	27	0	2	9	1.84	1	0	0	0	1	0	0	0	1	1	2	3	3	6	5	1
45	2	47	0	2.4	1	1	1	0	2	0	0	14.9	43.5	0	1	5	1.67	1	0	0	0	0	0	0	0	1	1	9	0	1	1	1	1
46	2	50	1	8	1	1	1	0	1	0	0	11.8	41.4	0	1	5	278.6	1	0	0	0	0	0	0	0	1	1	28.5	0	3	1	3	1
47	2	56	0	1.6	1	1	1	0	3	0	0	14.5	41.7	0	1	5	3.48	1	0	0	0	0	0	0	0	1	1	4	0	0	1	1	1
48	2	62	0	6.5	1	2	1	0	4	0	0	6.9	34.1	0	1	6	2.86	1	0	0	0	0	0	0	0	1	1	9	1	2	5	4	1
49	2	50	1	3	1	1	1	0	2	0	0	15.7	52.1	0	1	5	58.4	1	0	0	0	0	0	0	0	1	1	8.5	0	3	1	1	1
50	2	60	0	4	1	2	1	0	3	0	0	15.2	39.1	0	1	5	52.89	1	0	0	0	0	0	0	1	1	1	7	0	1	1	3	1
51	1	59	0	11	1	2	3	0	4	0	0	25.4	43.4	0	1	5	800	1	0	0	0	0	0	0	0	1	1	8	3	2	1	4	0
52	1	64	0	8.5	1	1	1	0	1	0	0	14.4	40.2	0	1	5	800	1	0	0	0	0	0	0	0	1	1	7.5	1	2	1	3	1
53	1	40	0	6.8	3	2	2	0	1	0	0	5.5	42.2	0	1	5	1.33	0	0	0	1	1	0	0	0	0	1	6.5	1	3	6	5	0
54	2	52	1	25	1	2	3	0	-6	0	0	31.1	36.8	0	1	5	154.6	1	0	0	0	0	0	0	0	1	2	6	2	3	5	4	1
55	2	61	1	4	1	2	1	1	2	0	0	17.5	33.8	0	1	6	693.2	1	0	0	0	0	0	0	0	1	1	12.5	1	3	4	3	1
56	1	47	1	4.2	1	1	1	0	4	0	0	8.2	49	0	1	5	4.1	0	0	0	1	1	0	0	0	0	1	8.5	0	3	6	5	1
57	2	52	0	7.2	1	1	3	0	2	0	0	19.6	39	0	1	5	20.28	1	0	0	0	0	0	0	0	1	1	14.5	2	2	1	3	0
58	2	48	2	13.5	1	1	3	0	4	0	2	21.2	41.7	0	2	7	10428	1	0	0	0	0	0	0	0	1	1	15	4	3	5	4	0
59	2	38	1	2.5	1	1	1	0	-6	0	0	15.8	42.4	0	1	5	520.6	1	0	0	0	0	0	0	0	1	1	3	1	3	1	1	0
60	2	64	0	6.5	1	1	3	0	3	0	0	8.3	42.2	0	1	5	2.8	1	0	0	0	0	0	0	0	0	1	7.5	2	2	1	3	1
61	1	45	1	-4	3	2	3	0	-6	0	0	2.9	38.1	0	1	5	4.28	0	0	0	1	0	0	0	0	0	6	5	2	3	3	4	1
62	2	46	3	7.5	1	1	1	0	2	0	2	26.2	39.2	0	2	7	37.01	1	0	0	0	1	0	0	0	1	1	10.5	1	4	6	5	1
63	2	39	1	4.2	3	2	2	1	2	0	1	17.8	41	0	1	6	20.76	1	0	0	0	0	0	5	1	1	1	3.5	2	3	4	4	1
64	1	52	0	2.5	1	1	1	0	3	0	0	8	37	0	1	5	4596	1	0	0	0	0	0	0	0	1	1	24	1	1	1	1	1
65	2	33	3	16	1	1	3	0	4	0	2	21.7	38.3	0	2	7	800	1	0	0	0	1	0	7	0	1	1	5	4	4	6	5	0
66	1	39	0	1	3	2	2	0	-6	0	0	15.2	38.4	0	1	5	-1	1	0	0	0	0	0	0	0	1	2	76	-2	2	2	3	1
67	2	47	0	2.5	1	1	1	0	-6	0	0	18.8	40.9	0	1	5	5.39	1	0	0	0	1	0	0	1	1	1	10	0	3	6	5	1
68	1	62	1	8	2	2	3	3	2	0	1	13.6	44.9	0	1	6	1774	1	0	0	0	1	0	0	0	1	1	8	3	3	6	5	1
69	1	69	1	8	1	1	1	0	1	0	0	11.3	47.7	0	1	5	126.3	1	0	0	0	0	0	0	0	0	1	6.5	0	3	1	3	1
70	2	63	1	3.7	1	1	1	0	3	0	0	20	41.7	0	1	5	4.27	1	0	0	0	0	0	0	0	1	1	6	0	3	1	2	1
71	2	48	1	2	1	1	1	0	4	0	0	12.2	47.3	0	1	5	800	1	0	0	0	0	0	0	0	0	1	10.5	1	3	1	1	1
72	2	64	0	8.5	1	1	1	1	2	0	0	31.6	41.3	0	1	5	2.31	1	0	0	0	0	0	4	1	1	1	9	0	2	4	4	1
73	2	59	1	11	1	1	3	3	2	0	1	13.4	39.9	0	1	6	13371	1	0	0	0	0	0	0	0	1	1	16	3	3	5	4	0
74	2	58	0	4	3	1	2	0	3	0	0	10.5	44.6	0	1	5	4.2	0	0	1	0	0	0	0	0	1	1	7.5	1	2	2	2	1
75	2	34	0	2	1	1	1	0	3	0	0	11	41.8	0	1	5	3.14	1	0	0	0	0	0	0	0	1	1	4.5	0	0	1	1	1
76	2	11	3	19	1	2	3	1	-6	0	0	16.4	44.1	0	1	5	24200	1	0	0	0	1	1	0	0	0	5	4	3	4	7	5	0
77	2	45	0	7.5	2	2	2	3	4	0	0	8.6	36.8	0	1	5	9842	1	0	0	0	0	0	0	0	0	1	10	2	2	5	4	0
78	2	44	1	2.8	1	1	1	0	2	0	0	7.1	45.7	0	1	5	3.77	1	0	0	0	0	0	0	0	1	1	10.5	0	3	1	1	1
79	2	58	2	7	1	1	1	3	1	0	0	7.7	49.8	0	1	5	44.93	1	0	0	0	0	0	0	0	0	1	12	0	3	5	3	0
80	2	51	0	5.5	1	2	1	1	2	0	0	14	41.2	0	1	5	26.12	1	0	0	0	0	0	5	0	1	1	8	1	3	4	4	1
81	2	46	0	1.9	1	1	1	0	3	0	0	12.5	43	0	1	5	2.9	0	0	0	1	0	0	0	0	0	1	7	0	0	1	1	1
82	2	60	0	3	1	1	1	0	2	0	0	16.4	45.5	0	1	5	0.6	1	0	0	0	0	0	0	0	1	1	33	0	1	1	1	1
83	2	43	0	4.5	1	1	1	0	5	0	0	12.1	39.3	0	1	5	50.77	1	0	0	0	0	0	0	0	1	1	11.5	0	1	1	2	1
84	2	74	0	2.5	1	1	1	0	2	0	0	17	38.6	0	1	5	128	0	0	0	1	0	0	0	0	1	1	6	0	1	1	1	1
85	1	55	1	3	1	2	1	0	5	0	0	11.5	46.7	0	1	5	38.97	1	0	0	0	0	0	0	0	1	1	6.5	0	3	1	1	1
86	2	68	2	4	1	2	1	0	2	0	0	130.5	39.6	0	2	7	3.89	0	0	0	1	1	0	0	0	1	1	12	1	3	6	5	1
87	2	48	0	1.7	3	2	2	0	2	0	1	16.5	40.9	0	1	6	7.44	1	0	0	0	0	0	0	0	1	1	4	1	2	2	3	1
88	1	61	2	8.5	3	2	2	2	2	0	0	12.3	42.4	0	1	5	1.16	1	0	0	0	1	0	6	0	1	1	5	1	3	6	5	1
89	2	40	2	7.5	1	2	1	0	1	0	0	45.9	33.4	0	2	7	98.31	1	0	0	0	1	0	0	0	1	1	11	1	3	6	5	1
90	2	51	0	5.5	1	1	1	0	3	0	0	19.6	40.7	0	1	5	0.96	1	0	0	0	1	0	0	0	1	1	5	0	3	6	5	1
91	2	50	1	5.5	3	2	2	3	5	0	0	9.4	40.9	0	1	5	24200	1	0	0	0	0	0	6	0	1	1	10.5	2	3	5	4	1
92	2	59	0	10	1	1	3	0	2	0	0	23.7	41.5	0	1	5	475.8	1	0	0	0	0	0	0	0	0	1	10	3	2	1	3	1
93	2	38	2	14	1	1	3	1	1	0	0	11.4	36.2	0	1	5	282.4	1	0	0	0	0	0	5	0	1	1	8.5	3	3	4	4	1
94	1	64	4	6	1	1	1	0	2	0	3	4.9	25.8	0	2	9	4.74	0	0	0	1	0	0	0	0	0	1	12.5	1	4	1	4	1
95	2	59	0	2.8	1	1	1	0	2	0	0	16.1	41.2	0	1	5	2.43	1	0	0	0	0	0	0	1	0	4	5.5	0	1	1	1	1
96	2	37	1	2.1	1	2	1	2	4	0	0	6.8	44.9	0	1	5	102.87	1	0	0	0	0	0	6	0	1	1	4.5	0	3	2	1	1
97	2	48	1	10	3	1	3	3	3	0	0	34.6	34.2	0	2	7	8.45	1	0	0	0	1	0	0	1	1	1	7	2	3	6	5	1
98	2	48	0	4.5	1	1	1	0	3	0	0	17.6	42	0	1	5	6.8	1	0	0	0	0	0	0	0	1	1	10	0	1	1	2	1
99	2	63	1	-4	3	2	3	1	-6	0	0	16.3	39	0	1	5	176.98	1	0	0	0	0	0	1	1	1	2	6	3	3	4	5	0
100	2	58	1	3.5	1	1	1	0	2	0	0	12.5	44.7	0	1	5	1137	1	0	0	0	0	0	0	0	0	1	3	1	3	1	2	0
101	2	58	1	12.5	2	2	3	0	5	0	1	10.3	42.2	0	1	6	1824	0	0	0	1	0	0	0	0	1	1	8	3	3	1	4	1
102	2	51	0	3	1	1	1	0	2	0	1	5.3	38.2	0	1	6	-1	1	0	0	0	0	0	0	0	1	1	5.5	-2	1	1	1	1
103	2	40	0	1.6	1	1	1	0	4	0	0	20.7	45	0	1	5	9.87	1	0	0	0	0	0	0	0	0	1	8.5	0	0	1	1	1
104	2	57	1	16.4	1	2	3	0	-6	0	1	17.5	39.1	0	1	6	28.86	1	0	0	0	0	0	0	0	0	2	8	2	3	1	4	0
105	1	62	0	3.7	1	1	1	0	2	0	0	14.2	43.4	0	1	5	1399	1	0	0	0	0	0	0	0	1	1	10	1	1	1	2	1
106	2	42	1	7.5	1	1	3	0	3	0	0	11.6	43.4	0	1	5	24200	0	0	0	1	0	0	0	0	0	1	10.5	3	3	1	3	1
107	2	61	1	16.2	3	2	3	0	-6	0	0	16.2	30	0	1	6	94.83	1	0	0	0	0	0	0	0	0	6	9	2	3	3	4	0
108	2	39	0	2.8	1	1	1	0	2	0	0	34.2	47.4	0	1	6	13.36	1	0	0	0	0	0	0	0	0	1	5	0	1	1	1	1
109	2	64	2	5.8	3	2	3	0	-6	0	0	16.7	32.6	0	1	6	1823	1	0	0	0	1	1	0	0	0	5	2	3	3	7	5	0
110	2	57	1	5	1	2	1	0	-6	0	0	12	40.9	0	1	5	895.5	1	0	0	0	0	0	0	0	1	1	60.5	1	3	1	3	1
111	2	55	0	7.5	1	1	1	0	-6	0	0	27.4	35.8	0	1	5	21.13	1	0	0	0	0	0	0	1	1	3	19	0	2	1	3	1
112	2	51	1	5	3	2	2	3	-6	0	1	37.5	34.6	0	2	8	191.66	1	0	0	0	0	0	0	1	1	2	4	2	3	2	3	0
113	2	36	1	-4	3	1	3	1	-6	0	1	17.6	33.7	0	2	7	-1	1	0	0	0	0	0	1	0	0	3	4	-2	3	4	5	0
114	2	54	1	-4	1	2	3	0	-6	0	0	13.8	39.6	0	1	5	3.52	1	0	0	0	0	0	0	0	0	2	5	2	3	1	4	1
115	2	68	0	7	1	1	3	0	2	0	0	10.7	35.6	0	1	5	76.86	1	0	0	0	0	0	0	0	1	1	18	2	2	1	3	1
116	2	59	2	-4	1	2	1	0	-6	0	0	12.8	29	0	1	6	4149	1	0	0	0	0	1	0	0	0	5	2	3	3	7	5	0
117	2	46	0	3.5	2	2	2	0	5	0	0	24.5	40.6	0	1	5	19.61	1	0	0	0	0	0	0	0	1	1	11	1	2	2	3	0
118	2	53	2	-4	3	2	3	1	-6	0	2	21.5	29.3	1	2	8	-1	1	0	0	0	0	0	5	1	1	6	1	-2	3	4	4	0
119	2	60	1	-4	3	2	2	0	-6	0	0	7.6	38	0	1	5	8.55	1	0	0	0	1	0	0	1	1	2	7	1	3	6	5	0
120	2	36	0	2.4	3	1	2	0	-6	0	1	10.6	35.2	0	1	6	3.06	1	0	0	0	0	0	0	1	1	3	5	1	1	1	1	1
121	2	78	0	4	1	1	1	0	-6	0	0	20.5	41.8	0.2	1	5	1.71	1	0	0	0	0	0	0	0	1	3	52	0	1	1	2	1
122	2	63	1	3.1	2	1	2	0	-6	0	0	18.2	43.1	0	1	5	3.69	1	0	0	0	0	0	0	0	1	4	2.5	1	1	2	2	1
123	2	66	1	18.9	1	2	3	1	-6	0	1	31	35.6	0	1	6	90.01	1	0	0	0	0	0	8	1	1	6	2	3	3	4	5	0
124	2	84	1	-4	3	1	2	0	-6	0	0	62.4	40	0	2	7	3.97	0	0	0	1	0	0	0	0	0	6	7	2	3	2	4	0
125	2	56	0	4.5	1	1	1	0	4	0	0	14.9	44.5	0	1	5	8.04	1	0	0	0	0	0	0	0	1	1	17	0	1	1	2	1
126	1	43	1	4.5	1	1	1	0	5	0	1	37	41.8	0	2	7	23.67	0	0	0	1	0	0	0	0	1	1	10.5	1	3	1	4	1
127	2	64	3	9	1	2	3	1	-6	0	3	68.6	29.1	0	3	10	288.4	0	0	1	0	0	0	1	0	1	6	3	5	4	4	6	0
128	2	48	2	-4	3	2	2	0	-6	0	0	15.1	38.6	0	1	5	1.16	1	0	0	0	0	0	0	1	1	2	12	1	3	2	3	0
129	2	63	0	9.3	1	2	3	0	-6	0	0	14.5	38	0	1	5	-1	0	0	0	1	1	1	0	0	0	2	10	-2	3	7	5	0
130	2	58	2	9	3	2	3	0	2	0	1	10.5	33.1	0	2	7	480.2	1	0	0	0	0	0	0	0	1	1	6.5	4	3	3	4	0
131	1	62	1	4	1	1	1	0	5	0	3	17.5	39	0	1	6	7.98	1	0	0	0	0	0	0	1	1	1	32	0	3	1	2	1
132	2	64	1	3.2	1	1	1	0	-6	0	0	17.8	40.9	0	1	5	2.36	1	0	0	0	0	0	0	0	0	3	17	0	3	1	2	1
133	2	62	0	-4	3	2	2	3	-6	0	0	6.4	37.4	0	1	5	10455	1	0	0	0	0	1	0	1	1	2	5	2	3	7	5	0
134	1	61	1	1.8	1	1	1	0	2	0	0	7.7	41.8	0	1	5	98.74	1	0	0	0	0	0	0	0	0	1	3	0	3	1	1	1
135	2	66	0	4.4	2	2	2	0	-6	0	1	40.2	26.1	0.8	2	9	146.83	1	0	0	0	0	0	0	0	1	4	3	2	2	2	4	1
136	2	43	1	2.5	1	1	1	0	1	0	0	28.7	35.9	0	1	5	16.71	1	0	0	0	0	0	0	0	1	1	12	0	3	1	1	1
137	2	56	1	-4	3	2	2	1	-6	0	0	23.4	29.2	0	1	6	24200	1	0	0	0	0	0	1	0	0	2	3	2	3	4	5	0
138	2	59	1	3.8	2	2	2	1	-6	0	0	222.6	39.1	0	2	7	6.17	1	0	0	0	1	0	1	0	0	6	3	3	3	6	5	0
139	2	66	1	3.2	1	1	1	0	5	0	0	20	47.4	0	1	5	1.3	1	0	0	0	0	0	0	0	1	1	5	0	3	1	2	1
140	2	55	1	5.3	3	2	2	1	-6	0	1	19.6	33.6	0.5	2	7	3.9	1	0	0	0	0	0	1	0	0	2	8	3	3	4	5	0
141	1	55	1	7.5	1	2	3	0	-6	0	0	15.6	35.3	0	1	5	24200	1	0	0	0	0	0	0	0	0	2	43.5	3	3	1	3	1
142	1	47	0	-4	3	2	2	0	-6	0	0	13.5	37	0	1	5	88.74	1	0	0	0	0	0	0	0	1	3	6	1	2	2	3	1
143	2	56	0	3	3	1	2	0	-6	0	0	22.8	38.7	0	1	5	364.9	1	0	0	0	0	0	0	0	1	2	16.5	1	1	2	2	0
144	2	50	0	4	1	1	1	0	-6	0	1	7.4	37.9	0	1	6	6.87	1	0	0	0	0	0	0	1	1	1	10.5	0	1	1	2	1
145	2	66	1	3.2	1	1	1	0	2	0	0	8.5	47.7	0	1	5	84.84	1	0	0	0	0	1	0	0	1	1	28	0	3	7	5	0
146	2	68	1	4	2	1	2	0	2	0	0	5.6	24.1	0	2	7	1.68	1	0	0	0	0	0	0	0	0	1	24.5	1	3	2	4	1
147	2	43	1	1.1	1	1	1	0	-6	0	2	43.7	27.1	2.3	3	10	28.33	1	0	0	0	0	0	0	1	1	4	4.5	2	4	1	6	1
148	1	62	1	7.8	3	2	2	1	-6	0	2	40.7	30	0	2	9	24200	1	0	0	0	0	0	5	1	1	6	2	4	3	4	5	0
149	1	71	1	2	1	1	1	0	3	0	1	6.5	44.8	0	2	7	179.41	1	0	0	0	0	0	0	0	1	1	11	1	3	1	4	1
150	2	51	1	11	1	2	3	1	-6	0	0	12.7	44.2	0	1	5	800	1	0	0	0	0	0	5	0	0	2	4.5	4	3	4	5	1
151	2	68	0	2.5	2	2	2	0	-6	0	0	14.8	36.6	0	1	5	75.65	1	0	0	0	0	0	0	1	1	3	21.5	1	1	2	3	1
152	2	65	1	6.7	2	2	2	0	-6	0	0	16.1	40.3	0	1	5	8.73	1	0	0	0	0	0	0	0	1	2	9.5	1	3	3	4	0
153	1	66	0	3.8	2	1	2	0	-6	0	0	16.5	40.6	0	1	5	15.24	1	0	0	0	0	0	0	0	0	2	4	1	2	2	2	1
154	2	46	0	2.2	1	1	1	0	1	0	0	15.6	44.4	0	1	5	7.37	1	0	0	0	0	0	0	0	0	1	10	0	1	1	1	1
155	2	46	1	11.7	1	2	3	1	-6	0	0	22.3	38.1	0	1	5	24200	1	0	0	0	0	0	1	0	0	2	1.5	4	3	4	5	0
156	1	63	2	3	1	1	1	0	-6	0	1	9.4	39.4	0	1	6	2.91	0	0	0	1	0	0	0	1	1	6	19	0	3	1	1	0
157	2	58	1	10	1	2	3	0	4	0	1	12.1	35	0	2	7	176.98	1	0	0	0	0	0	0	0	1	1	6	3	3	1	4	0
158	2	70	1	-4	1	1	1	0	-6	0	1	7.2	37.1	0	1	6	561.2	1	0	0	0	1	0	0	0	1	2	30	1	3	6	5	1
159	2	57	1	3	1	1	1	0	-6	0	1	10.9	37.6	0	1	6	0.8	1	0	0	0	0	0	0	1	1	1	24	0	3	1	1	0
160	2	45	2	7	1	2	1	0	4	0	0	7.1	36.9	0	1	5	241.9	1	0	0	0	0	0	0	0	1	1	10	0	3	1	4	0
161	1	60	1	-4	1	2	3	0	-6	0	0	21.1	31.2	0	1	6	24200	1	0	0	0	0	0	0	0	0	6	2.5	3	3	1	4	0
162	2	51	0	3.8	1	1	1	0	3	0	1	14.9	41.9	0	1	6	5.43	1	0	0	0	0	0	0	0	1	1	3	0	1	1	2	1
163	2	62	1	2.7	2	2	2	0	-6	0	0	20.4	40.2	0	1	5	10.6	1	0	0	0	1	0	0	1	1	2	3	1	3	6	5	1
164	2	48	2	7.8	1	1	1	0	1	0	0	13.3	43	0	1	5	80.1	1	0	0	0	0	0	0	0	1	1	17	0	3	1	3	1
165	2	70	3	10.8	3	2	3	0	-6	0	2	13.6	35.4	0	2	7	8.45	0	0	0	1	1	1	0	0	0	6	2	3	4	7	5	0
166	2	57	0	2.5	1	1	1	0	5	0	0	11.2	50.6	0	1	5	1.28	0	0	0	1	0	0	0	0	1	1	36	0	1	1	1	1
167	2	63	2	-4	3	2	2	0	-6	0	2	41.2	29.3	3.2	2	9	28	1	0	0	0	0	0	0	1	1	6	10	2	3	2	4	1
168	2	54	1	-4	1	1	2	0	-6	0	0	24.7	42.3	0	1	5	31.81	1	0	0	0	0	0	0	0	1	2	39	1	3	2	2	1
169	2	51	1	5	1	1	1	0	1	0	0	17	44.5	0	1	5	4.15	1	0	0	0	0	0	0	0	1	1	10	0	3	1	2	0
170	2	50	1	12.5	1	2	3	1	2	0	0	16.5	39.2	0	1	5	146.33	1	0	0	0	0	1	1	0	1	1	18	3	3	7	5	0
171	2	62	1	2.5	1	1	1	0	2	0	1	15.6	42.4	0	1	6	1.66	1	0	0	0	1	0	0	0	1	1	11.5	0	3	6	5	1
172	2	79	0	5.5	1	1	1	0	-6	0	0	38.7	44.1	0	1	6	19.36	0	0	0	1	0	0	0	0	1	3	4.5	0	2	1	3	1
173	2	44	1	-4	1	1	1	0	-6	0	2	60.2	34.9	1.8	3	10	24200	0	0	0	1	0	0	1	0	1	5	3	6	4	4	6	1
174	2	47	2	-4	3	2	3	1	-6	0	2	30.4	36.4	0	2	7	11.63	0	0	0	1	1	1	5	0	0	6	1	3	3	7	5	0
175	2	55	1	3.8	1	1	1	0	-6	0	0	22.7	46.6	0	1	5	691.3	0	0	1	0	0	0	0	0	0	3	17.5	1	3	1	2	0
176	2	68	2	18.5	3	2	3	0	-6	0	1	16.7	40.6	0	1	6	-1	0	0	0	1	1	0	0	0	0	2	4	-2	3	6	5	1
177	2	58	1	6	1	1	1	0	2	0	0	18.5	41.1	0	1	5	8.98	1	0	0	0	0	0	0	0	1	1	2	0	3	1	3	0
178	2	45	1	-4	3	2	2	1	-6	0	2	17	33.7	0	2	8	-1	1	0	0	0	0	0	1	0	1	2	2.5	-2	3	4	5	0
179	2	57	0	3.7	1	2	1	1	-6	0	0	19.5	37.1	0	1	5	139.1	1	0	0	0	0	0	0	0	1	1	7	0	1	4	3	0
180	2	48	1	4.5	1	1	1	0	-6	0	0	10.4	38.1	0	1	5	110.8	1	0	0	0	0	0	0	0	1	1	8.5	0	3	1	2	0
181	2	60	1	2	1	1	1	0	-6	0	0	19.7	46.5	9.4	2	7	4.88	1	0	0	0	0	0	0	1	1	3	30.5	1	3	1	4	1
182	2	64	2	2.4	1	1	1	0	-6	0	0	61.4	22.6	3.4	2	9	20.15	1	0	0	0	1	0	0	1	1	6	7	1	3	6	5	1
183	1	56	1	6	1	1	1	3	2	0	1	12.6	37.1	0	1	6	-1	1	0	0	0	0	0	0	0	1	1	15	-2	3	5	3	0
184	2	56	0	3.5	2	1	2	0	1	0	0	22.7	45.4	0	1	5	4.28	1	0	0	0	0	0	0	0	0	1	47	1	2	2	2	0
185	2	56	2	-4	3	2	2	0	-6	0	0	24.3	45.6	0	1	5	68.19	1	0	0	0	0	0	0	0	0	6	5	1	3	2	3	0
186	2	56	1	9	1	2	3	1	4	0	0	23.9	34.1	0	1	6	11963	1	0	0	0	0	0	1	0	1	1	3	4	3	4	5	0
187	2	48	1	4	1	1	1	0	1	0	0	22.7	37	0	1	5	36.68	1	0	0	0	1	0	0	1	1	1	8	0	3	6	5	0
188	2	64	1	1.6	3	2	2	0	-6	0	0	18.3	34.5	0	1	6	44.12	1	0	0	0	0	0	0	0	1	2	21	1	3	2	3	0
189	2	63	1	5.3	1	1	1	0	-6	0	0	20.3	42.8	0	1	5	8.64	1	0	0	0	1	0	0	0	0	6	7.5	0	3	6	5	0
190	2	57	0	2	2	2	2	0	-6	0	0	12.8	42.9	0	1	5	21.97	1	0	0	0	1	0	0	1	1	4	13	1	3	6	5	1
191	1	62	0	5.3	1	1	1	0	-6	0	0	13.8	33	0	1	6	379	1	0	0	0	0	0	0	0	1	1	38	0	2	1	3	1
192	2	61	0	1.3	1	1	1	0	-6	0	0	17.7	37	0	1	5	34.5	0	1	0	0	0	0	0	0	0	4	32	0	0	1	1	0
193	2	45	2	6.5	3	2	2	0	2	0	0	17	36.7	0	1	5	215.58	1	0	0	0	0	0	0	0	1	1	4	1	3	3	4	0
194	2	41	1	1.5	2	2	2	0	-6	0	0	17.4	48.2	0	1	5	9.39	1	0	0	0	0	0	0	0	1	6	19.5	1	3	2	3	1
195	1	61	1	6.3	3	2	2	0	-6	0	0	6.6	39.3	0	1	5	8.22	0	0	0	1	0	0	0	0	0	2	4	1	3	1	4	0
196	2	60	2	-4	3	2	3	1	-6	0	2	31.6	25.8	1.3	2	9	39.84	1	0	0	0	1	1	8	1	1	6	1	4	3	7	5	0
197	2	60	1	4.8	2	1	2	1	-6	0	0	15	41.6	0	1	5	30.79	1	0	0	0	0	0	1	0	1	6	2	2	3	4	5	1
198	2	59	2	4.7	1	1	1	0	-6	0	0	28.6	21	4.4	2	8	1.61	0	0	0	1	0	1	0	0	0	6	3	1	3	7	5	0
199	2	80	0	4.2	2	2	2	0	-6	0	0	12.4	44.5	0	1	5	9.65	0	1	0	0	0	0	0	1	1	4	33.5	1	1	1	3	1
200	1	63	2	15.6	1	2	3	0	-6	0	0	12.5	39.9	0	1	5	5.14	0	0	0	1	1	0	0	0	0	2	4.5	2	3	6	5	1
201	1	61	3	1	3	2	3	1	-6	0	3	25	32.9	0	2	8	24200	1	0	0	0	0	1	5	0	1	6	11	5	4	7	5	0
202	2	59	1	14	3	2	3	0	-6	0	0	16.2	36.1	0	1	5	3692	0	0	0	1	0	0	0	0	0	6	3.5	3	3	3	4	1
203	2	56	1	6	2	2	2	0	3	0	1	20	30.6	0	2	7	5.28	1	0	0	0	0	0	0	0	1	1	13	3	3	3	4	0
204	2	62	2	-4	3	2	2	1	-6	0	0	28.7	43.9	0	1	6	24200	0	0	0	1	0	0	1	1	0	6	1	3	3	4	5	0
205	2	55	2	-4	3	2	3	0	-6	0	2	22.1	27.4	0	2	9	917.1	1	0	0	0	0	0	0	1	1	2	28	4	3	2	4	1
206	2	60	1	-4	2	1	2	1	-6	0	2	55.4	28.7	0.1	3	10	3.11	1	0	0	0	0	0	1	1	1	6	5	4	4	4	6	1
207	2	58	0	8.8	3	2	2	0	-6	0	0	14.4	49.5	0	1	5	2.4	0	0	0	1	0	0	0	1	1	2	2.5	2	2	3	4	1
208	2	77	3	-4	3	2	2	0	-6	0	2	38.3	26	1.3	3	10	2.71	0	0	0	1	0	1	0	0	0	6	10	3	4	7	6	0
209	2	32	1	14.3	1	2	3	0	-6	0	0	19.1	34.2	0	1	6	24200	1	0	0	0	1	0	0	0	0	2	6	3	3	6	5	0
210	2	49	1	10	1	2	3	0	-6	0	0	4.6	38.9	0	1	5	8000	1	0	0	0	0	0	0	1	0	2	4	3	3	1	3	0
211	2	44	2	-4	3	2	2	1	-6	0	2	42	28.9	1.5	2	9	634.3	1	0	0	0	1	1	8	0	0	6	1	4	3	7	5	0
212	2	71	0	10	1	2	3	0	2	0	0	21.9	40	0	1	5	423.1	0	0	0	1	0	0	0	0	1	1	43	3	2	1	4	1
213	2	49	1	11	3	2	3	0	-6	0	0	13.6	33.2	0	1	6	17134	1	0	0	0	1	0	0	0	1	6	8	3	3	6	5	0
214	2	41	0	1.7	1	1	1	0	2	0	1	16.4	39.5	0	1	6	47.87	1	0	0	0	0	0	0	0	1	1	13.5	0	0	1	1	1
215	2	52	2	9.8	3	2	3	1	-6	0	1	12.9	33.5	0	2	7	1.7	1	0	0	0	0	0	1	1	1	6	2	4	3	4	5	0
216	1	54	0	2.4	3	2	2	0	-6	0	1	26.5	30.4	0	2	7	6991	1	0	0	0	1	0	0	0	1	2	3	3	3	6	5	1
217	2	45	0	3.2	3	1	2	0	-6	0	0	13.8	39	0	1	5	-1	1	0	0	0	0	0	0	0	1	6	9.5	-2	2	2	2	1
218	2	53	2	8.7	1	1	1	0	-6	0	0	8.5	40.8	0	1	5	24200	1	0	0	0	0	0	0	0	0	2	12	1	3	1	3	0
219	1	58	1	10.5	1	2	3	0	-6	0	0	8.6	37.4	0	1	5	10654	0	0	0	1	0	0	0	0	0	6	9	3	3	1	4	0
220	2	47	3	-4	1	2	3	1	-6	0	0	29.5	26.7	0	2	7	709.7	1	0	0	0	1	1	1	0	0	6	8	5	4	7	5	0
221	2	61	1	3.9	1	1	1	0	-6	0	1	27.1	32.5	0	2	7	5553	1	0	0	0	0	0	0	0	1	4	9.5	2	3	1	4	1
222	2	71	3	3.1	3	2	2	1	-6	0	1	32.2	28.8	0	2	7	-1	1	0	0	0	0	0	1	0	1	6	14	-2	4	4	5	1
223	2	75	0	2.5	3	2	2	0	-6	0	0	15	43.7	0	1	5	10.41	0	0	0	1	1	0	0	0	0	4	24	1	3	6	5	0
224	2	47	0	7	1	1	1	1	-6	0	0	11.6	35.9	0	1	5	1.74	0	0	0	1	0	0	5	0	1	5	2.5	1	3	4	4	1
225	2	44	1	-4	1	1	1	0	1	0	1	16.5	44.1	0	1	6	800	1	0	0	0	1	1	0	0	1	5	4	1	3	7	5	0
226	2	83	3	13	2	2	3	1	-6	0	3	8.4	28.5	0	2	8	528.3	0	0	0	1	0	0	1	0	0	6	4	5	4	4	5	0
227	2	57	0	1.9	1	1	1	0	-6	0	0	7.4	37.8	0	1	5	2.46	1	0	0	0	0	0	0	0	0	3	11	0	0	1	1	1
228	2	46	1	15.5	3	2	3	0	-6	0	1	41.6	41.5	0	2	7	40.61	1	0	0	0	1	0	0	1	0	6	7	3	3	6	5	0
229	2	66	1	7.5	1	2	3	0	1	0	1	39.8	38.5	0	2	7	8237	1	0	0	0	0	0	0	0	1	1	30	4	3	1	4	1
230	2	60	1	9	3	2	3	0	-6	0	1	13.6	38.6	0	1	6	24200	1	0	0	0	1	0	0	0	0	2	1	3	3	6	5	0
231	2	60	1	-4	3	2	3	0	-6	0	0	15.1	43.6	0	1	5	5.75	0	0	0	1	0	0	0	0	0	5	9	2	3	2	3	1
232	2	58	1	2.6	1	1	1	0	-6	0	0	11.3	42.8	0	1	5	145.9	1	0	0	0	0	0	0	0	1	2	67	1	3	1	1	1
233	2	63	2	1.9	3	2	2	0	-6	0	3	39.8	24.7	0	3	10	130.7	0	0	0	1	0	0	0	0	1	3	5.5	3	4	2	6	0
234	1	55	2	1.4	1	1	1	1	-6	0	1	19.5	40.8	0	1	6	4.06	1	0	0	0	0	0	1	1	1	1	13	1	3	1	1	1
235	2	38	3	-4	1	2	3	2	-6	0	2	63	30.7	3.2	3	10	-1	1	0	0	0	1	1	2	1	1	6	0.25	-2	4	7	6	0
236	1	65	0	8.2	1	1	3	1	-6	0	1	10.5	34.4	0	2	7	2.89	1	0	0	0	0	0	5	0	1	6	9	4	3	4	4	1
237	2	39	2	8.5	3	2	2	2	-6	0	0	31	35.4	0	1	5	-1	1	0	0	0	1	1	2	1	1	6	11	-2	3	7	5	0
238	2	62	1	16	1	2	3	2	-6	0	0	15.3	39	0	1	5	9225	1	0	0	0	0	0	2	0	1	6	5	3	3	5	5	0
239	2	63	1	5	1	1	1	0	-6	0	0	8.2	38.9	0	1	5	2.44	1	0	0	0	0	0	0	1	1	6	4.5	0	3	1	2	1
240	2	78	0	2.5	1	2	1	0	-6	0	0	14.9	42	0	1	5	-1	1	0	0	0	0	0	0	0	1	6	12	-2	1	1	1	1
241	1	33	1	24.1	2	1	3	0	-6	0	0	21.9	32	0	1	6	24200	1	0	0	0	0	1	0	0	0	6	2	3	3	7	5	0
242	2	37	2	-4	3	2	2	2	4	0	0	4.3	29.6	0	1	6	8708	0	0	0	1	0	1	2	0	0	5	5	2	3	7	5	0
243	2	57	0	8	3	2	2	0	-6	0	0	8.5	33.9	0	1	6	-1	1	0	0	0	0	0	0	0	0	3	10	-2	2	3	4	1
244	1	69	2	1.4	1	1	1	0	-6	0	1	15.2	26.6	0	2	8	2.42	0	1	0	0	0	0	0	1	1	3	3	1	3	1	4	0
245	1	49	1	2.6	1	1	1	0	-6	0	1	22.2	40.1	0	1	6	120.8	1	0	0	0	0	0	0	0	1	1	0.67	0	3	1	1	0
246	2	54	2	-4	3	2	2	1	-6	0	2	767.3	28	4	3	11	3402	1	0	0	0	0	0	1	1	1	6	0.6	5	4	4	6	0
247	1	43	1	5.3	1	1	1	0	-6	0	0	60.7	38.6	1	2	7	1439	0	0	0	1	0	0	0	0	1	2	9	2	3	1	4	1
248	2	57	2	-4	3	2	2	0	-6	0	3	130.4	27.8	0	3	11	48.67	1	0	0	0	0	0	0	1	1	6	0.27	4	4	3	6	0
249	2	73	0	4	1	1	1	0	-6	0	0	14.4	46.4	0	1	5	420.46	0	0	0	1	0	0	0	0	0	5	4	1	1	1	2	1
250	2	61	2	14	3	2	3	1	-6	0	0	23.9	34.4	0	1	6	9.62	0	0	0	1	1	1	5	0	0	6	1	3	3	7	5	0
251	2	61	1	4.6	1	1	1	0	-6	0	0	168.6	40.1	0	2	7	654.2	1	0	0	0	1	0	0	0	0	6	4	2	3	6	5	0
252	2	41	1	9.8	1	2	3	2	-6	0	3	17.3	36.1	1.9	2	7	800	0	0	0	1	0	0	2	1	1	6	12	4	3	2	5	1
253	2	50	1	6.4	1	1	1	1	-6	0	0	24.8	38	0	1	5	42.97	1	0	0	0	0	0	1	0	1	2	11	1	3	4	5	1
254	2	74	0	3.9	1	1	1	0	-6	0	0	14	39.1	0	1	5	5	0	0	0	1	1	0	0	0	0	3	3	0	3	6	5	1
255	2	81	3	-4	3	2	3	1	-6	0	2	127.2	28.6	0.9	3	10	103666	0	0	0	1	0	0	8	0	0	6	0.9	6	4	4	6	0
256	1	45	0	2.5	3	1	2	0	-6	0	0	8.3	35	0	1	6	4.85	1	0	0	0	0	0	0	0	1	5	9	1	1	2	1	1
257	1	64	3	-4	3	2	3	0	-6	0	2	265.2	26.8	3.4	3	11	1.14	0	0	0	1	0	0	0	0	0	6	0.1	4	4	3	6	0
258	1	68	1	10.2	1	2	3	0	-6	0	0	15	37.1	0	1	5	4.16	0	0	0	1	1	0	0	0	0	2	12	2	3	6	5	0
259	2	49	0	2	1	1	1	0	-6	0	0	26.1	30.4	0	1	6	4.95	1	0	0	0	0	0	0	0	0	2	5	0	0	1	1	1
260	2	54	1	-4	1	1	1	0	-6	0	0	12.7	40.2	0	1	5	65.82	1	0	0	0	0	1	0	1	1	2	4	0	3	7	5	0
261	2	66	1	-4	3	2	2	0	-6	0	0	11.2	39.4	0	1	5	2037	0	0	0	1	1	1	0	0	1	5	6	2	3	7	5	0
262	2	62	1	9.3	2	2	3	1	-6	0	1	10.2	31	0	2	7	104.2	1	0	0	0	1	0	1	0	1	3	3	4	3	6	5	0
263	1	45	0	2.9	1	1	1	0	-6	0	0	7.7	43.1	0	1	5	4.38	1	0	0	0	0	0	0	0	1	4	7	0	1	1	1	1
264	2	64	1	11	1	2	3	1	-6	0	2	16.4	31.4	0	2	8	2455	1	0	0	0	0	0	5	1	1	6	11	5	3	4	4	0
265	2	64	1	-4	3	2	2	1	-6	0	0	17.1	34.1	0	1	6	800	1	0	0	0	1	0	1	1	1	2	14	3	3	6	5	1
266	2	59	1	3.8	3	1	2	0	-6	0	1	48.6	31	0.9	2	8	12.05	1	0	0	0	0	0	0	1	1	3	3	2	3	2	4	1
267	1	42	1	6.4	1	1	1	0	-6	0	0	14.6	29.5	1.6	1	6	3.23	1	0	0	0	0	0	0	1	1	6	7	0	3	1	3	1
268	2	59	1	3.5	1	1	1	0	2	0	0	18.9	41	0	1	5	19.33	1	0	0	0	0	0	0	0	1	1	21.5	0	3	1	2	1
269	2	62	0	2.6	1	1	1	0	-6	0	0	8.4	41.7	0	1	5	1617	1	0	0	0	0	0	0	0	1	2	37	1	1	1	1	0
270	2	54	1	0.7	3	2	2	2	-6	0	0	16.3	39.2	0	1	5	3	0	0	1	0	0	0	0	1	1	2	9	1	3	2	3	1
271	2	50	1	-4	1	2	3	0	-6	0	0	15.3	38.3	0	1	5	106.2	1	0	0	0	0	0	0	0	0	2	5	2	3	1	4	1
272	2	47	1	-4	1	2	3	1	-6	0	0	10.5	30.3	0	1	6	2574	0	0	0	1	0	1	1	0	0	2	10	4	3	7	5	0
273	1	61	1	1.2	1	1	1	0	-6	0	1	84.5	34.1	1.6	2	9	22.04	1	0	0	0	0	0	0	1	1	4	28.5	1	3	1	4	1
274	2	38	1	7	1	1	1	1	4	0	1	13.2	47	0	1	6	182.3	1	0	0	0	0	0	5	0	0	1	10	1	3	4	4	0
275	2	56	2	5.8	1	1	1	0	-6	0	0	12.6	36.7	0	1	5	16.3	1	1	0	0	0	0	0	1	1	2	6	2	3	1	3	1
276	2	72	1	4.1	3	2	2	0	-6	0	0	9.3	35.5	0	1	5	4.89	0	0	1	0	1	0	0	0	0	6	11.5	1	3	6	5	0
277	1	58	2	-4	1	1	1	1	-6	0	0	6.8	36.4	0	1	5	628.7	1	0	0	0	0	1	5	0	0	2	9	2	3	7	5	0
278	1	64	0	3	2	2	2	0	-6	0	0	8.8	44.3	0	1	5	1.37	1	0	0	0	0	0	0	0	0	2	13	1	1	2	2	1
279	2	56	0	2.2	2	2	2	0	-6	0	0	14.6	39.1	0	1	5	8.39	1	0	0	0	0	0	0	0	0	3	42.5	1	1	2	2	1
280	2	71	2	7.5	1	1	1	0	-6	0	0	12.8	34.2	0.5	1	6	5.28	0	0	0	1	0	0	0	0	0	2	13	0	3	1	3	0
281	2	26	1	15	1	1	3	0	2	0	0	27.8	39.1	0	1	5	85.74	0	0	0	1	0	0	0	0	0	2	17	2	3	1	4	0
282	2	32	1	12.6	1	2	3	0	-6	0	0	23.6	36.3	0	1	5	24200	1	0	0	0	0	0	0	0	0	2	6	3	3	1	4	0
283	2	78	1	2.1	1	1	1	0	-6	0	0	16	37.7	0	1	5	7.8	0	1	0	0	0	0	0	0	0	3	30	0	3	1	1	0
284	2	59	0	6	1	1	1	0	2	0	0	13.1	36.7	0	1	5	199.8	1	0	0	0	0	0	0	0	0	1	17	0	2	1	3	0
285	2	60	0	2.9	3	2	2	0	-6	0	0	44.9	29.2	0	2	7	7.66	1	0	0	0	0	0	0	1	1	2	11	2	2	2	4	1
286	2	64	1	1.7	1	1	1	0	-6	0	0	16.8	38.4	0	1	5	306.7	1	0	0	0	0	0	0	0	0	3	24	0	3	1	1	1
287	2	53	0	1.7	1	1	1	0	2	0	0	11.2	45	0	1	5	3.3	1	0	0	0	0	0	0	0	0	1	34.5	0	0	1	1	1
288	1	56	1	1.1	1	1	1	0	-6	0	0	19.5	37.9	0	1	5	6.48	0	1	0	0	0	0	0	1	1	3	4	0	3	1	1	1
289	2	46	2	7.5	1	1	1	0	2	0	2	26.2	39.2	0	2	7	37.01	1	0	0	0	0	0	0	0	1	1	11	1	3	1	4	1
290	1	58	1	10	1	1	3	0	2	0	1	17.7	48.5	0	1	6	4492	1	0	0	0	0	0	0	0	1	1	10	3	3	1	3	1
291	2	47	0	-4	1	1	1	0	-6	0	0	20.9	47.2	0	1	5	73.66	1	0	0	0	0	0	0	0	0	2	18.5	0	1	1	1	1
292	2	62	1	10	1	2	3	0	5	0	1	8.9	32.1	0	2	7	1	1	0	0	0	1	0	0	0	1	1	20	3	3	3	5	0
293	2	43	0	3.4	1	1	1	0	-6	0	0	15.8	42	0	1	5	42.07	1	0	0	0	1	0	0	1	1	5	11	0	3	6	5	1
294	1	48	1	7	2	2	2	0	-6	0	0	8.1	48.8	0	1	5	24200	0	0	0	1	0	0	0	0	1	4	36.5	3	3	3	4	1
295	2	37	3	16	3	2	3	2	4	0	0	5.1	30.3	0	1	6	8708	0	0	0	1	0	1	2	0	0	5	5	2	4	7	5	0
296	2	73	1	-4	1	2	3	1	-6	0	0	21.1	36.7	0.9	1	5	71.47	1	0	0	0	1	0	8	0	0	2	21	3	3	6	5	0
297	2	66	1	-4	3	2	2	0	-6	0	0	22.5	46.1	0	1	5	2123	1	0	0	0	0	1	0	0	0	2	21	2	3	7	5	0
298	2	50	1	3.2	1	1	1	1	-6	0	0	10.5	43.6	0	1	5	138.4	1	0	0	0	0	0	5	0	0	2	27	1	3	4	4	1
299	2	59	0	5.8	1	1	1	0	4	0	0	15.4	41.7	0	1	5	2714.21	1	0	0	0	0	0	0	0	1	1	31	1	2	1	3	1
300	2	47	0	1.5	1	1	1	0	-6	0	0	15.7	37.6	0	1	5	10.04	1	0	0	0	0	0	0	0	1	3	25	0	0	1	1	1
301	2	70	1	6	3	2	3	0	-6	0	0	28.6	33.5	0	1	6	2355	1	0	0	0	0	0	0	0	1	2	8	3	3	3	4	0
302	2	55	0	3.5	2	1	2	0	4	0	0	20.5	47.1	0	1	5	3.13	1	0	0	0	0	0	0	0	1	1	36.5	1	2	2	2	1
303	2	60	0	3	1	1	1	0	-6	0	0	16.6	39.3	0	1	5	7.24	1	0	0	0	0	0	0	0	0	2	21	0	1	1	1	1
304	2	37	0	3.1	1	1	1	0	3	0	0	14.2	47.1	0	1	5	31.16	1	0	0	0	0	0	0	0	1	1	45	0	1	1	1	1
305	2	53	1	-4	1	1	1	0	-6	0	0	10.7	43.3	0	1	5	358.6	1	0	0	0	0	0	0	0	0	2	53.5	0	3	1	1	1
306	2	41	0	4.5	1	1	1	0	2	0	0	10.4	49.5	0	1	5	18.36	1	0	0	0	0	0	0	0	1	1	16	0	1	1	2	1
307	1	58	1	3.7	3	2	2	0	-6	0	0	12.2	41.5	0	1	5	320.4	1	0	0	0	0	0	0	0	1	3	2.5	1	3	2	3	1
